# Supplementary material for: Effects of Dispersant on the Petroleum Hydrocarbon Biodegradation and Microbial Communities in Seawater from the Baltic Sea and Norwegian Sea
Source: MDPI journal article supplement (doi:10.3390/microorganisms11040882), 2023-03-29
Supplement: s1 [file s1]

## Supplementary material

Table S1. Petroleum hydrocarbon (C10-C40) concentrations of different WAF (without dispersant) and CE-WAF (with dispersant) dilutions in the control experiment with GoF seawater. Averages are means of 2, in abiotic controls means of 3.

| Control experiment treatments  | Petroleum hydrocarbons C10-C40 (µg/L) |       |
|--------------------------------|---------------------------------------|-------|
|                                | Average                               | Stdev |
| Undiluted WAF 0h               | 1020                                  | 180   |
| Undiluted CEWAF 0h             | 555000                                | 45000 |
| WAF 1:1 0h                     | 505                                   | 45    |
| WAF 1:1 12d                    | 305                                   | 5     |
| WAF 1:1 abiotic control 12d    | 363                                   | 91    |
| CEWAF 1:50 0h                  | 10000                                 | 0     |
| CEWAF 1:50 12d                 | 11500                                 | 1500  |
| CEWAF 1:50 abiotic control 12d | 10700                                 | 1203  |
| Only dispersant 1:50 0h        | 745                                   | 25    |
| Only dispersant 1:50 12d       | 565                                   | 115   |

Table S2. PAH concentrations of different WAF (without dispersant) and CE-WAF (with dispersant) dilutions in the control experiment. Averages are means of 2. For calculation of PAH sum and averages values below detection limit have been set to half of the detection limit.

| PAH compounds          | PAH concentrations (µg/L) |                       |                          |                           |                             |                              |
|------------------------|---------------------------|-----------------------|--------------------------|---------------------------|-----------------------------|------------------------------|
|                        | Undiluted<br>WAF 0h       | Undiluted<br>CEWAF 0h | WAF 0h (1:1<br>dilution) | WAF 12d (1:1<br>dilution) | CEWAF 0h<br>(1:50 dilution) | CEWAF 12d<br>(1:50 dilution) |
| PAH Sum                | 388.76±50.41              | 4819.3±566.69         | 173.92±22.31             | 6.82±0.62                 | 158.71±17.5                 | 59.57±6.73                   |
| 1-Methylnaphthalene    | 51.5±1.5                  | 940±20                | 24±2                     | 1.725±1.375               | 30±3                        | 18.5±2.5                     |
| 2-Methylnaphthalene    | 125±5                     | 2400±100              | 54±3                     | 0.905±0.795               | 73±8                        | 21.5±0                       |
| Anthracene             | 0.0945±0.0025             | 1.5±0                 | 0.0515±0.0015            | 0.054±0.003               | 0.155±0.015                 | 0.16±0                       |
| Acenaphthene           | 1.2±0                     | 78±52                 | 0.61±0.01                | 0.855±0.445               | 3.75±1.05                   | 3.05±0.35                    |
| Acenaphthylene         | 0.525±0.095               | 104.5±5.5             | 0.315±0.005              | 0.655±0.275               | 2.6±1.2                     | 1.7±0.1                      |
| Benzo(a)anthracene     | 0.0945±0.0025             | 0.005±0*              | 0.0515±0.0015            | 0.054±0.003               | 0.155±0.015                 | 0.160                        |
| Benzo[a]pyrene         | 0.005±0*                  | 1.85±0.65             | 0.005±0*                 | 0.005±0*                  | 0.049±0.023                 | 0.053±0.001                  |
| Benzo[b]fluoranthene   | 0.005±0*                  | 2.95±1.45             | 0.005±0*                 | 0.005±0*                  | 0.116±0.054                 | 0.12±0                       |
| Benzo[e]pyrene         | 0.005±0*                  | 3.75±2.15             | 0.005±0*                 | 0.005±0*                  | 0.166±0.074                 | 0.175±0.005                  |
| Benzo[ghi]perylene     | 0.005±0*                  | 1.75±0.75             | 0.005±0*                 | 0.005±0*                  | 0.057±0.026                 | 0.063±0.002                  |
| Benzo[k]fluoranthene   | 0.005±0*                  | 3.2±1.7               | 0.005±0*                 | 0.005±0*                  | 0.116±0.054                 | 0.12±0                       |
| Dibenz[a,h]anthracene  | 0.005±0*                  | 0.945±0.055           | 0.005±0*                 | 0.005±0*                  | 0.0085±0.0035               | 0.005±0*                     |
| Phenanthrene           | 2.3±0                     | 77.5±42.5             | 1.2±0                    | 1.05±0.05                 | 6.1±1.2                     | 1.6±0.1                      |
| Fluoranthene           | 0.034±0                   | 0.00415±0.00165       | 0.0205±0.0005            | 0.021±0.001               | 0.355±0.125                 | 0.32±0.01                    |
| Fluorene               | 3±0.1                     | 185±5                 | 2.1±0                    | 1.15±0.05                 | 5.8±1.2                     | 4.7±0                        |
| Indeno[1.2.3-cd]pyrene | 0.005±0*                  | 1.19±0.31             | 0.005±0*                 | 0.005±0*                  | 0.0225±0.0105               | 0.014±0.009                  |
| Chrysene               | 0.012±0                   | 5.7±3.5               | 0.0063±0                 | 0.005±0*                  | 0.245±0.105                 | 0.25±0                       |
| Naphthalene            | 205±15                    | 1000±0                | 91.5±3.5                 | 0.308±0.242               | 35±2                        | 6.1±4.9                      |
| Perylene               | 0.005±0*                  | 3±1.5                 | 0.005±0*                 | 0.005±0*                  | 0.123±0.057                 | 0.125±0.005                  |
| Pyrene                 | 0.0025±0*                 | 0.0025±0*             | 0.0025±0*                | 0.0025±0*                 | 0.0025±0*                   | 0.0025±0*                    |
| Triphenylene           | 0.0165±0.0015             | 8.45±5.55             | 0.05±0*                  | 0.0305±0.0195             | 0.375±0.155                 | 0.355±0.005                  |

\*Measurements below LOD (value divided by 2).

Table S3. Biomarker ratios (Pristane/Phytane, C17/C18, C17/Pristane, C18/Phytane, Norpristane/Pristane) for 12d CE-WAF, 12d sterile control CE-WAF and North Sea Crude oil. Samples were obtained from the control experiment.

| Sample/Treatment*          | Pr/Pf | C17/C18 | C17/Pr | C18/Pf | NPr/Pr |
|----------------------------|-------|---------|--------|--------|--------|
| North Sea Crude oil        | 1.14  | 0.54    | 1.88   | 3.98   | 1.04   |
| 12d sterile control CE-WAF | 1.19  | 0.53    | 1.78   | 3.98   | 1.00   |
| 12d CE-WAF                 | 0.98  | 0.50    | 2.25   | 4.38   | 1.19   |

\*12d WAF and 12d sterile control WAF were also analysed but did not contain these long-chain biomarkers and ratios could thus not be calculated.

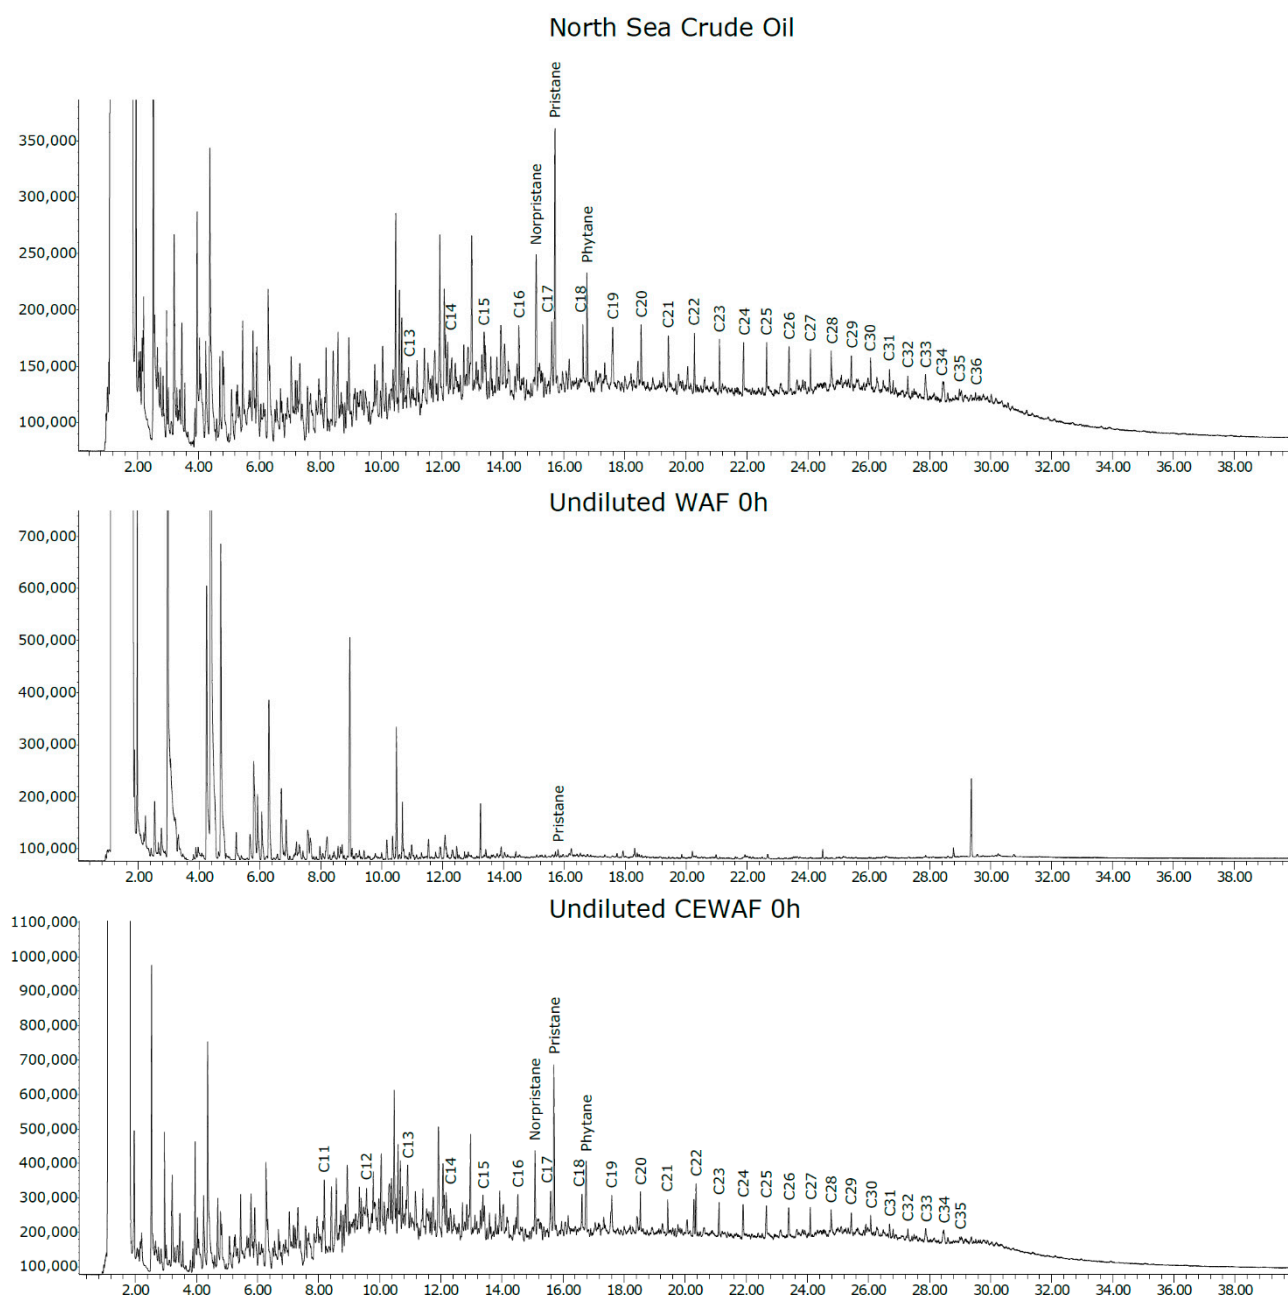

Figure S1. Gas chromatograms for pure North Sea crude oil, undiluted CE-WAF (with dispersant) 0h and undiluted WAF (without dispersant) at the start of the control experiment

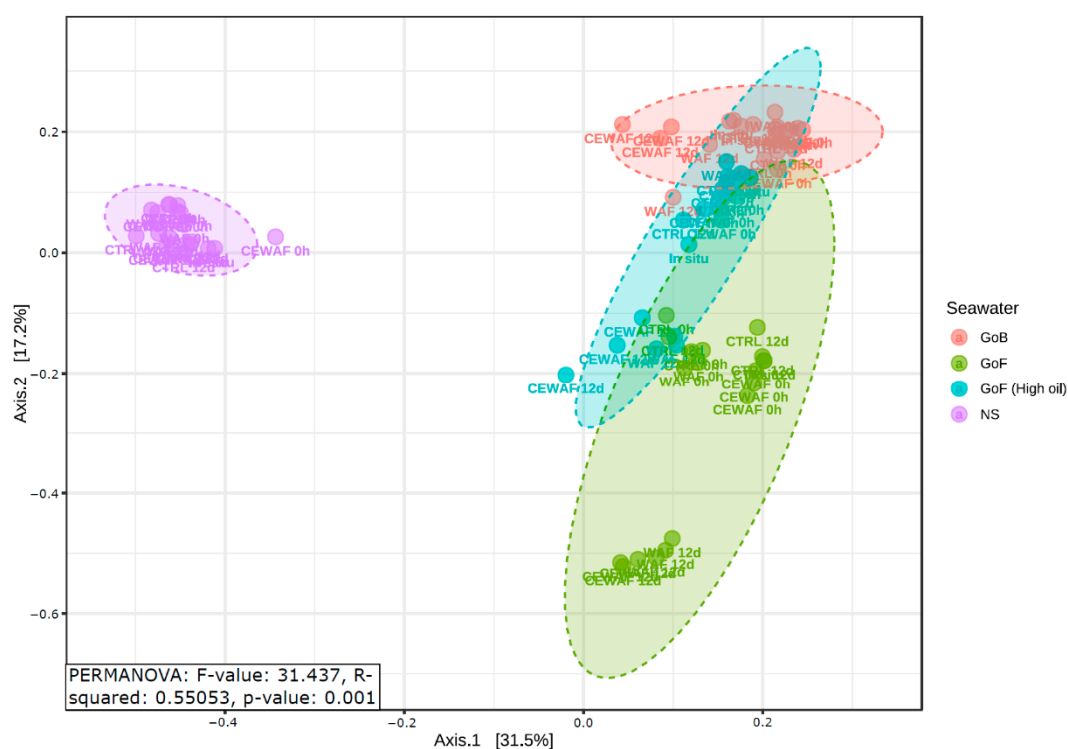

Figure S2. Principal Coordinates Analysis (PCoA) of microbial communities comparing different microcosm experiments. PCoA was based on Bray-Curtis distance matrix using OTU level data.

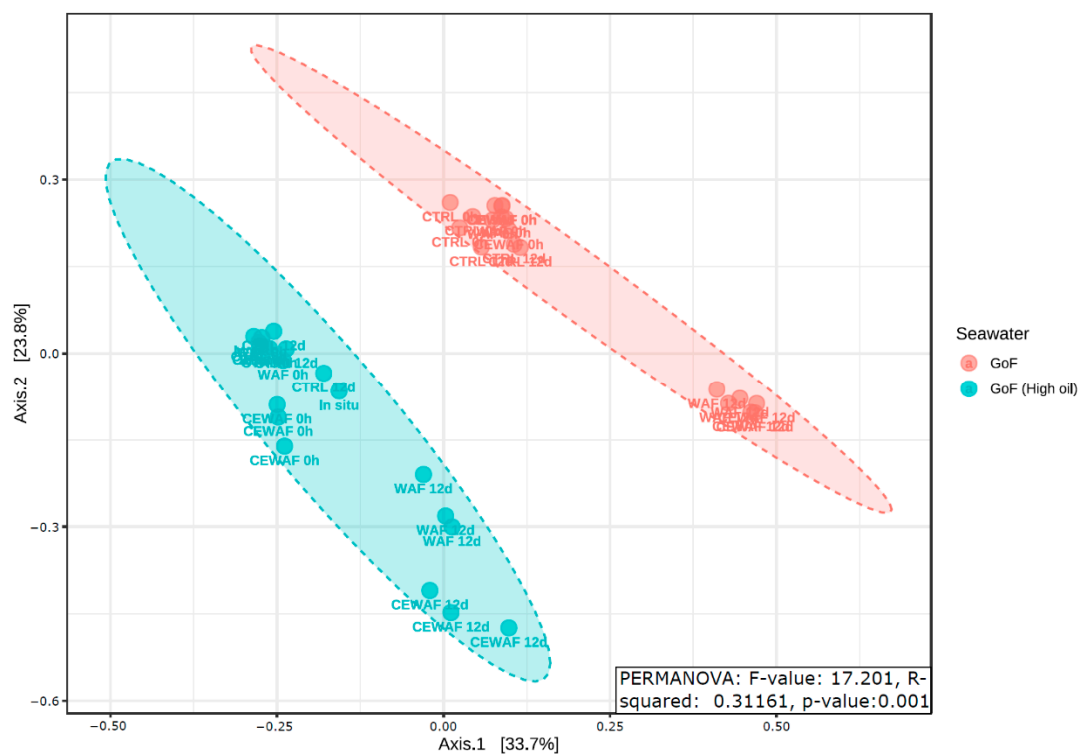

Figure S3. PCoA of microbial communities comparing high and low oil level Gulf of Finland experiments. PCoA was based on Bray-Curtis distance matrix using OTU level data

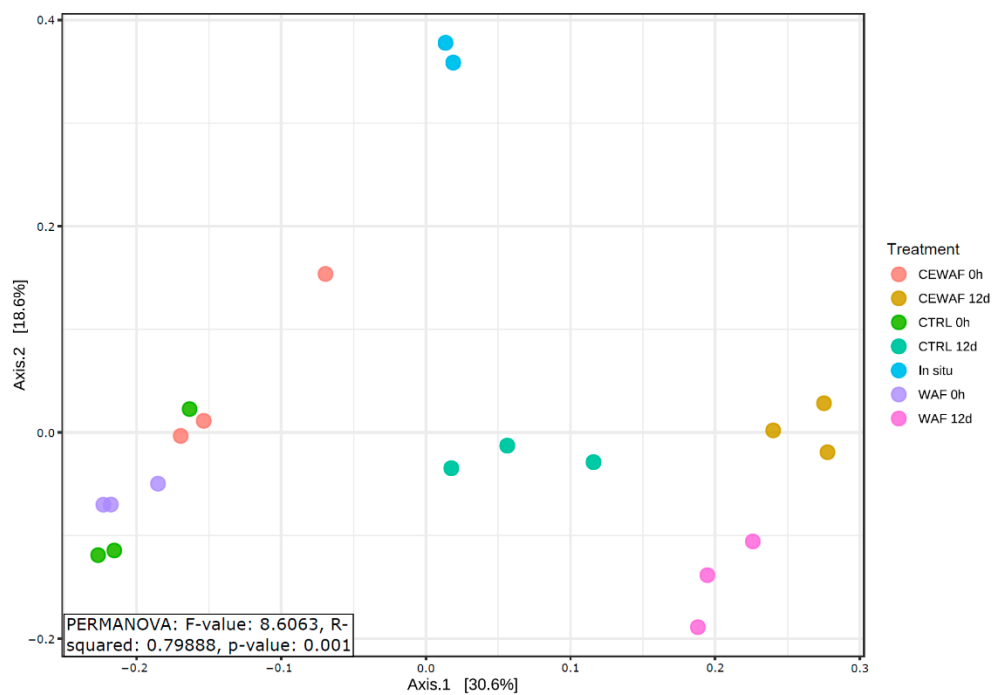

Figure S4. PCoA of microbial communities of Norwegian Sea experiment. PCoA was based on Bray-Curtis distance matrix using OTU level data.

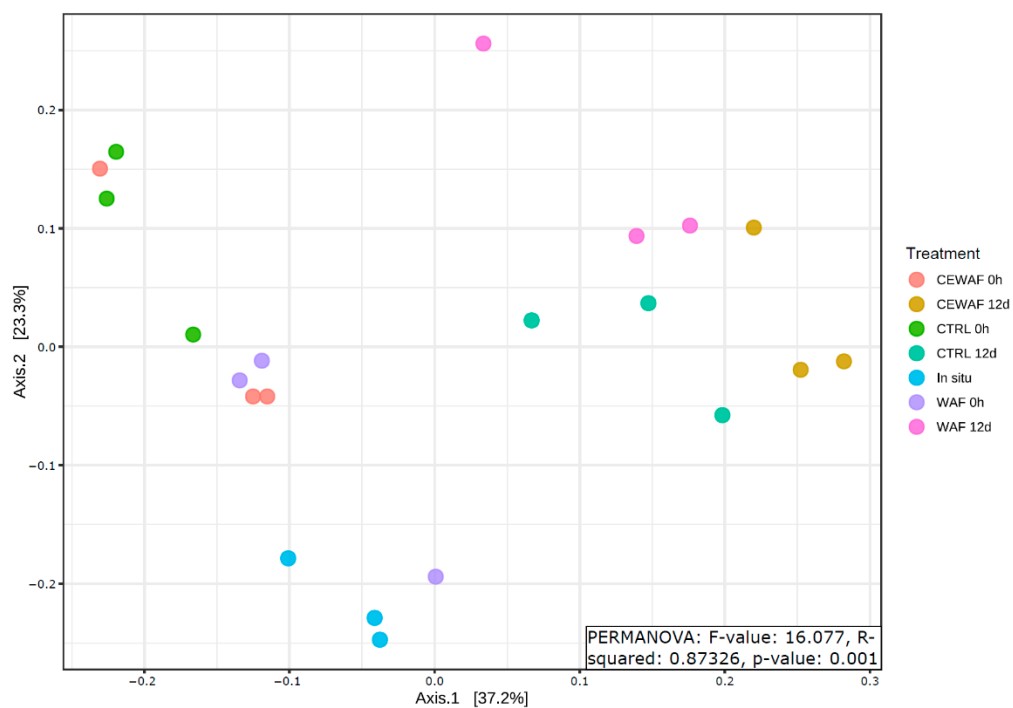

Figure S5. PCoA of microbial communities of Gulf of Bothnia experiment. PCoA was based on Bray-Curtis distance matrix using OTU level data.

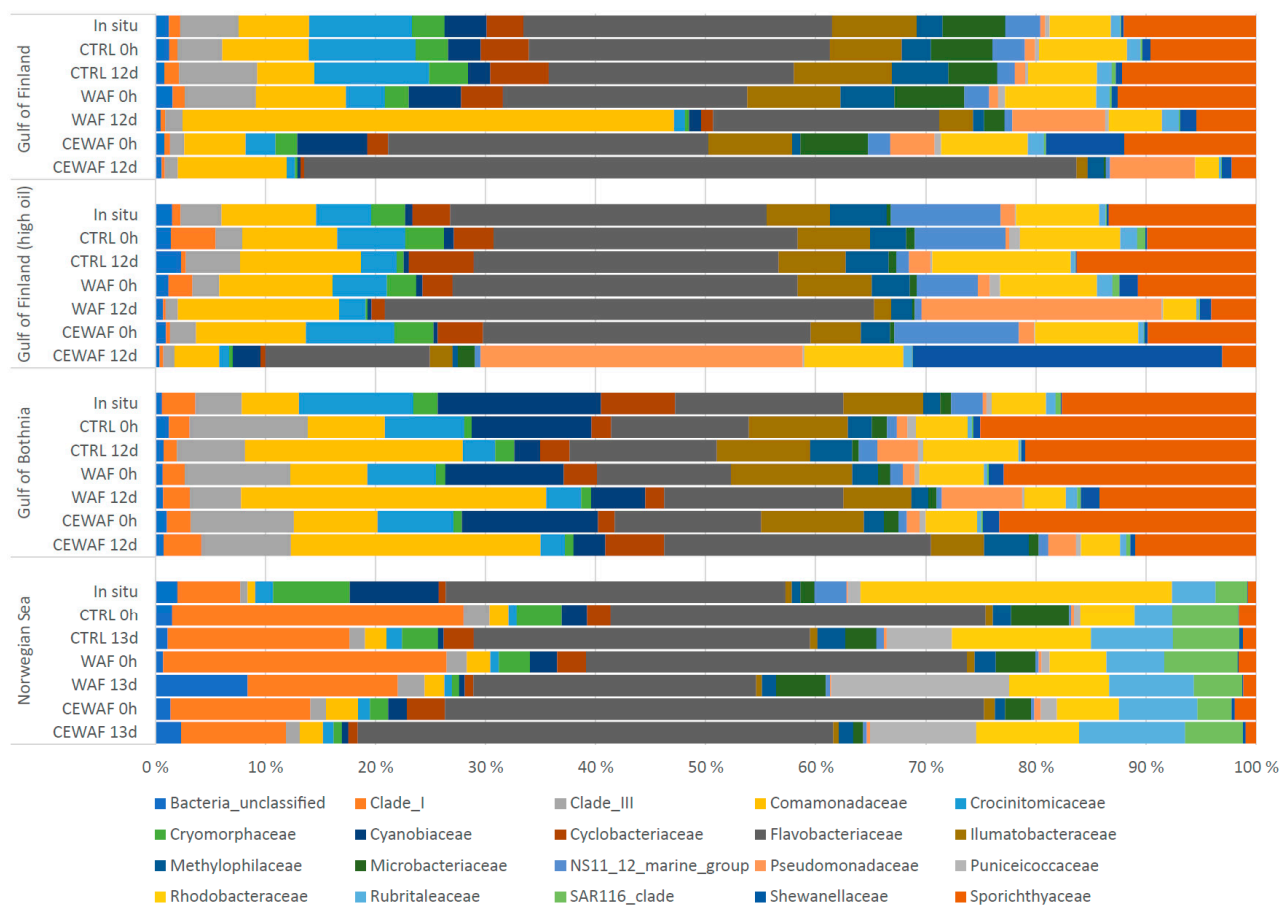

Figure S6. The relative abundance of top 20 most abundant bacterial taxa on family level. Each bar in the figure is the average abundance calculated from three replicates for different experiments (Gulf of Bothnia, Norwegian Sea and Gulf of Finland with high and low oil concentration seawater).
